# Supplementary material for: Peculiar Properties of the La0.25Ba0.25Sr0.5Co0.8Fe0.2O3−δ Perovskite as Oxygen Reduction Electrocatalyst
Source: Molecules. 2023 Feb 8;28(4):1621. doi: 10.3390/molecules28041621 (PMC9965584; doi:10.3390/molecules28041621)
Supplement: Supplementary file 1 [file molecules-28-01621-s001.zip › molecules-2149608-supplementary.pdf]

# Supplementary Materials

**Table S1: Results of Rietveld Refinement**

**Table S1:** Label, space group, weight phase fraction (wt.%) with relative volume (V) and lattice parameters (a, b, c) of BP-HET, LBSCF, BSCF900, BSCF1000, LSCF900 and LSCF1000. Uncertainty is on the last digit for volumes and cell parameters; uncertainty for wt.% is  $\leq 3\%$ .

| Samples  | Space group | a (Å)    | b (Å)    | c (Å)    | V (Å <sup>3</sup> ) | wt.% | $\chi^2$ | R <sup>F2</sup> (%) |
|----------|-------------|----------|----------|----------|---------------------|------|----------|---------------------|
| BP-HET   | R-3c        | 5.48595  | 5.48595  | 13.36251 | 348.275             | 77   | 1.34     | 10.03               |
|          | Pm-3m       | 3.90357  | 3.90357  | 3.90357  | 59.482              | 23   |          |                     |
| LBSCF    | R-3c        | 5.48328  | 5.48328  | 13.39569 | 348.801q            | 100  | 1.28     | 10.18               |
| BSCF900  | Pm-3m       | 3.98612  | 3.98612  | 3.98612  | 63.336              | 96   | 1.20     | 16.87               |
|          | P63-mc      | 11.71647 | 11.71647 | 6.90845  | 821.311             | 4    |          |                     |
| BSCF1000 | Pm-3m       | 3.98435  | 3.98435  | 3.98435  | 63.252              | 100  | 1.23     | 21.02               |
| LSCF900  | R-3c        | 5.43196  | 5.43196  | 13.26246 | 338.897             | 100  | 1.42     | 7.93                |
| LSCF1000 | R-3c        | 5.43164  | 5.43164  | 13.25898 | 338.769             | 100  | 1.26     | 8.71                |

**Table S2: Results of XPS Analysis**

**Table S2:** XPS data of BSCF900, BSCF1000, LSCF900 and LSCF1000 in terms of O1s and Sr 3d5/2 binding energies and the relative percentage of the different component are given.

| Samples  | O1s BE (eV), relative percentage (%) | Sr 3d5/2 BE (eV), relative percentage (%) |
|----------|--------------------------------------|-------------------------------------------|
| BSCF900  | 529.4, 24                            | 133.5, 100                                |
|          | 532.2, 76                            |                                           |
| BSCF1000 | 529.2, 22                            | 133.6, 100                                |
|          | 531.7, 78                            |                                           |
| LSCF900  | 528.8, 32                            | 132.3, 47                                 |
|          | 532.1, 68                            |                                           |
| LSCF1000 | 528.8, 28                            | 132.3, 42                                 |
|          | 532.0, 72                            |                                           |

**Figure S1: TGA curves for all samples**

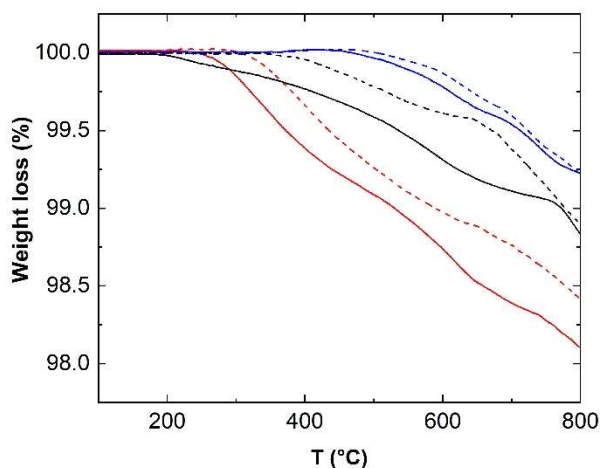

**Figure S1.** TGA curves calculated from step 4 (see experimental part) for BP-HET (red solid line), LBSCF (red dash line), LSCF900 (black solid line), LSCF1000 (black dash line), BSCF900 (blue solid line) and BSCF1000 (blue dash line).

### **Image analysis approach: HRTEM results**

The powders analysed by means of HRTEM showed an important electron diffraction visible for the presence of several fringes in the direct image space.

The distances between the fringes allow the evaluation of the  $d_{hkl}$  values that can be compared with the values obtained by means of XRD to evaluate preferential growth or reciprocal orientation of the crystals.

Even considering regions of the materials showing electron diffraction patterns enough extended to measure a reasonable number of fringes (limiting this way the error of the reading), the variability of the calculated values was huge, making almost impossible a direct identification of the families of planes giving diffraction though a direct comparison with the values obtained by XRD.

It is to note that the issue derived from a typical behaviour of the materials and not from a technical problem of the instrument or of the measurement.

The strategy adopted for obtaining useful information about the materials was, therefore, the following:

- 1) measurement of several diffraction patterns along a series of at least 10 highly resolved images (around 25 observed  $d_{hkl}$  values for sample),
- 2) grouping the  $d_{hkl}$  obtained in small intervals (in our case we considered the intervals 1.65-1.75, 2.02-2.10, 2.22-2.24, 2.27-2.35, 2.38-2.42, 2.68-2.72, 2.78-2.82, 2.89-2.90, larger than 3.00)
- 3) preparation of the  $d_{hkl}$  value distribution curve to define the values observed more frequently in the micrographs.

This way, the considerations on the sample characterization were carried out only considering the most representative values for the system under study.
